# Supplementary material
Source: Springer Nature journal article supplement (https://www.springermedizin.de/resource/supplementary/12889_2011_3773_MOESM4_ESM.pdf/9489620)

Incidence rates per 100,000 person-years

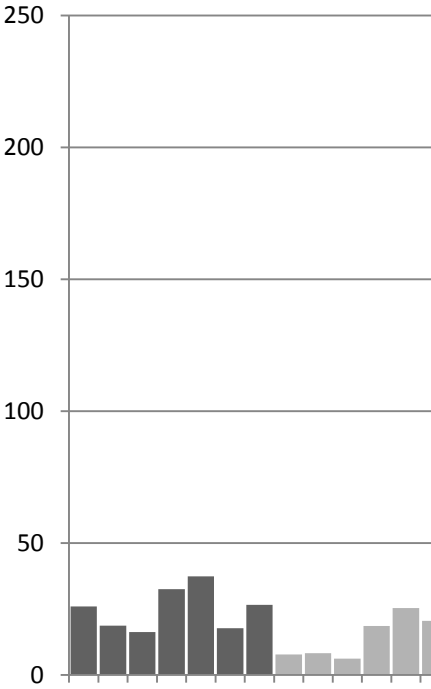

Mosaic type

Supplement: MOESM4 [file 9489620]
